# Supplementary material for: Association of Oral Anticoagulant Type With Risk of Dementia Among Patients With Nonvalvular Atrial Fibrillation
Source: PubMed Central journal article supplement — J Am Heart Assoc. 2018 Nov 2;7(21):e009561. doi: 10.1161/JAHA.118.009561 (PMC6404188; doi:10.1161/jaha.118.009561), 2018-11-02
Supplement: JAH3-7-e009561-s001.pdf [file JAH3-7-e009561-s001.pdf]

# Supplemental Materials

## Online Data Supplement

Table s1. ICD-9-CM codes used to define comorbidities.

| Condition                 | ICD-9-CM codes                                                                                                                                                                                                                                                                                                |
|---------------------------|---------------------------------------------------------------------------------------------------------------------------------------------------------------------------------------------------------------------------------------------------------------------------------------------------------------|
| Anemia                    | 280, 281, 282, 283, 284, 285                                                                                                                                                                                                                                                                                  |
| Cancer                    | 140-172, 174-195, 200-208, 238.6                                                                                                                                                                                                                                                                              |
| Cerebral bleeding         | 430, 431, 432, 852                                                                                                                                                                                                                                                                                            |
| Coagulopathy              | 286, 287.1, 287.3, 287.4, 287.5                                                                                                                                                                                                                                                                               |
| Cognitive impairment      | 331.1-331.9                                                                                                                                                                                                                                                                                                   |
| Diabetes                  | 250                                                                                                                                                                                                                                                                                                           |
| Gastrointestinal bleeding | 455.2, 455.5, 455.8, 456.0, 456.20, 530.7, 530.82, 531.0, 531.2, 531.4, 531.6, 532.0, 532.2, 532.4, 532.6, 533.0, 533.2, 533.4, 533.6, 534.0, 534.2, 534.4, 534.6, 535.01, 535.11, 535.21, 535.31, 535.41, 535.51, 535.61, 537.83, 562.02, 562.03, 562.12, 562.13, 568.81, 569.3, 569.85, 578.0, 578.1, 578.9 |
| Heart failure             | 398.91, 402.01, 402.11, 402.91, 404.01, 404.03, 404.11, 404.13, 404.91, 404.93, 425.4, 425.9, 428                                                                                                                                                                                                             |
| Hypertension              | 401, 402, 403, 404, 405                                                                                                                                                                                                                                                                                       |
| Prevalent ischemic stroke | 433, 434, 435, 436, 437, 438                                                                                                                                                                                                                                                                                  |
| Incident ischemic stroke* | 434, 436                                                                                                                                                                                                                                                                                                      |
| Kidney disease            | 403.01, 403.11, 403.91, 404.02, 404.03, 404.12, 404.13, 404.92, 404.93, 582, 583.0,                                                                                                                                                                                                                           |

|                           |                                                                                     |
|---------------------------|-------------------------------------------------------------------------------------|
|                           | 583.1, 583.2, 583.3, 583.4, 583.5, 583.6, 583.7, 585, 586, 588.0, V42.0, V45.1, V56 |
| Myocardial infarction     | 410, 412                                                                            |
| Mood disorders            | 293.83, 296, 311                                                                    |
| Other bleeding            | 423.0, 459.0, 568.81, 593.81, 599.7, 623.8, 626.6, 719.1, 784.7, 784.8, 786.3       |
| Peripheral artery disease | 440.0, 440.2, 440.9, 443.9                                                          |

\*Comorbidities were defined by any position from an inpatient or outpatient claim, except for *incident ischemic stroke*, which was defined by primary position from an inpatient claim.

Table s2. Baseline characteristics of patients with atrial fibrillation according to first prescribed oral anticoagulant before propensity score matching: MarketScan, 2007-2015.

|                                                   | Warfarin  | Dabigatran | Rivaroxaban | Apixaban  |
|---------------------------------------------------|-----------|------------|-------------|-----------|
| n                                                 | 217,087   | 31,305     | 39,349      | 19,358    |
| Age, years, mean (SD)                             | 70 (13)   | 67 (13)    | 67 (13)     | 69 (13)   |
| Women, %                                          | 38        | 35         | 38          | 40        |
| CHA <sub>2</sub> DS <sub>2</sub> -VASc, mean (SD) | 3.3 (2.0) | 3.1 (2.0)  | 3.0 (1.9)   | 3.4 (2.0) |
| HAS-BLED, mean (SD)                               | 1.9 (1.2) | 1.8 (1.2)  | 1.7 (1.1)   | 1.9 (1.2) |
| Disease history, %                                |           |            |             |           |
| Heart failure                                     | 29        | 25         | 24          | 28        |
| Hypertension                                      | 70        | 75         | 75          | 80        |
| Diabetes                                          | 30        | 29         | 28          | 30        |
| Myocardial infarction                             | 10        | 7.9        | 8.2         | 9.3       |
| Peripheral artery disease                         | 13        | 11         | 11          | 12        |
| Kidney disease                                    | 11        | 7.4        | 8.0         | 12        |
| Ischemic stroke                                   | 21        | 19         | 17          | 20        |
| GI bleeding*                                      | 7.3       | 7.4        | 5.8         | 6.1       |
| Prior cerebral bleeding                           | 1.0       | 0.7        | 0.7         | 1.0       |
| Other bleeding                                    | 9.3       | 9.5        | 8.3         | 8.6       |
| Anemia                                            | 20        | 15         | 17          | 18        |
| Coagulopathy                                      | 5.9       | 3.1        | 3.6         | 3.8       |
| Cancer                                            | 14        | 12         | 12          | 13        |
| Mood disorders                                    | 7.7       | 7.8        | 8.8         | 9.2       |

|                              |     |     |     |     |
|------------------------------|-----|-----|-----|-----|
| Cognitive impairment         | 3.0 | 2.7 | 2.5 | 2.9 |
| COPD†                        | 24  | 23  | 23  | 24  |
| Other medications, %         |     |     |     |     |
| Antiplatelet                 | 2.1 | 2.2 | 2.0 | 2.5 |
| Diuretic                     | 44  | 37  | 35  | 38  |
| Antiarrhythmic               | 6.6 | 11  | 11  | 11  |
| Digoxin                      | 18  | 14  | 11  | 10  |
| ACE inhibitor‡               | 38  | 37  | 34  | 35  |
| Angiotensin receptor blocker | 22  | 24  | 23  | 25  |
| Beta-blocker                 | 69  | 72  | 71  | 74  |
| Calcium channel blocker      | 38  | 40  | 39  | 41  |
| Lipid lowering medication    | 57  | 57  | 55  | 59  |

---

\*GI bleeding: gastrointestinal bleeding; †COPD: chronic obstructive pulmonary disease; ‡ACE inhibitor: angiotensin converting enzyme inhibitor; §SD: standard deviation.

Table s3. Baseline characteristics of patients with atrial fibrillation according to first prescribed oral anticoagulant before propensity score matching: Optum 2009-2015.

|                                  | Warfarin | Dabigatran | Rivaroxaban | Apixaban |
|----------------------------------|----------|------------|-------------|----------|
| n                                | 112,051  | 15,185     | 22,480      | 11,786   |
| Age, years, mean (SD)            | 73 (11)  | 69 (12)    | 70 (12)     | 73 (11)  |
| Women, %                         | 42       | 37         | 40          | 45       |
| Race, %                          |          |            |             |          |
| Asian                            | 1.8      | 2.3        | 2.2         | 2.1      |
| Black                            | 7.4      | 6.6        | 6.4         | 7.0      |
| Hispanic                         | 6.8      | 5.7        | 6.5         | 6.3      |
| White                            | 77       | 79         | 78          | 77       |
| Unknown                          | 6.9      | 6.8        | 7.5         | 8.0      |
| Education level, %               |          |            |             |          |
| Less than 12 <sup>th</sup> Grade | 0.6      | 0.3        | 0.4         | 0.5      |
| High School Diploma              | 29       | 26         | 25          | 27       |
| Less than Bachelor Degree        | 54       | 53         | 54          | 53       |
| Bachelor Degree Plus             | 12       | 17         | 16          | 15       |
| Unknown                          | 4.0      | 3.7        | 4.3         | 5.3      |
| Household income range, %        |          |            |             |          |
| <\$40 K                          | 34       | 24         | 24          | 27       |
| \$40 K- \$49 K                   | 9.0      | 7.5        | 8.0         | 8.5      |
| \$50 K- \$59 K                   | 7.7      | 7.3        | 7.5         | 7.3      |
| \$60 K- \$74 K                   | 9.2      | 9.9        | 10          | 9.1      |

|                                                   |           |           |           |           |
|---------------------------------------------------|-----------|-----------|-----------|-----------|
| \$75 K- \$99 K                                    | 11        | 13        | 13        | 12        |
| \$100 K+                                          | 16        | 27        | 25        | 23        |
| Unknown                                           | 14        | 12        | 12        | 13        |
| CHA <sub>2</sub> DS <sub>2</sub> -VASc, mean (SD) | 4.2 (2.0) | 3.6 (2.0) | 3.8 (2.1) | 4.2 (2.1) |
| HAS-BLED, mean (SD)                               | 2.5 (1.3) | 2.3 (1.3) | 2.4 (1.3) | 2.7 (1.3) |
| Disease history, %                                |           |           |           |           |
| Heart failure                                     | 38        | 30        | 31        | 36        |
| Hypertension                                      | 84        | 85        | 85        | 88        |
| Diabetes                                          | 37        | 34        | 35        | 37        |
| Myocardial infarction                             | 14        | 11        | 12        | 14        |
| Peripheral artery disease                         | 21        | 17        | 21        | 23        |
| Kidney disease                                    | 21        | 14        | 17        | 22        |
| Ischemic stroke                                   | 26        | 23        | 25        | 29        |
| GI bleeding*                                      | 9.2       | 9.2       | 11        | 12        |
| Prior cerebral bleeding                           | 1.3       | 0.9       | 1.0       | 1.5       |
| Other bleeding                                    | 12        | 12        | 15        | 16        |
| Anemia                                            | 30        | 23        | 28        | 30        |
| Coagulopathy                                      | 8.2       | 4.5       | 5.7       | 5.9       |
| Cancer                                            | 16        | 14        | 16        | 16        |
| Mood disorders                                    | 12        | 12        | 14        | 15        |
| Cognitive impairment                              | 4.8       | 3.8       | 4.2       | 5.3       |
| COPD†                                             | 31        | 28        | 31        | 33        |
| Other medications, %                              |           |           |           |           |

|                              |    |    |    |    |
|------------------------------|----|----|----|----|
| Antiplatelet                 | 13 | 13 | 14 | 16 |
| Diuretic                     | 47 | 39 | 41 | 47 |
| Antiarrhythmic               | 18 | 26 | 23 | 26 |
| Digoxin                      | 17 | 13 | 11 | 10 |
| ACE inhibitor‡               | 44 | 42 | 43 | 45 |
| Angiotensin receptor blocker | 19 | 22 | 25 | 27 |
| Beta-blocker                 | 68 | 72 | 72 | 76 |
| Calcium channel blocker      | 41 | 44 | 45 | 48 |
| Lipid lowering medication    | 59 | 59 | 60 | 64 |

---

\*GI bleeding: gastrointestinal bleeding; †COPD: chronic obstructive pulmonary disease; ‡ACE inhibitor: angiotensin converting enzyme inhibitor; §SD: standard deviation.



Table s4. Distribution of patients by sex and anticoagulant dosage. Standard dose is 150 mg for dabigatran, 20 mg for rivaroxaban, 5 mg for apixaban. Reduced dose is 75 mg for dabigatran, 10 or 15 mg for rivaroxaban, 2.5 mg for apixaban.

| <b>Women - MarketScan</b> |             |              |             |              |             |              |
|---------------------------|-------------|--------------|-------------|--------------|-------------|--------------|
|                           | Warfarin    | Dabigatran   | Warfarin    | Rivaroxaban  | Warfarin    | Apixaban     |
| Standard                  | N/A         | 9,549 (87%)  | N/A         | 10,350 (70%) | N/A         | 6,007 (77%)  |
| Reduced                   | N/A         | 1,437 (13%)  | N/A         | 4,503 (30%)  | N/A         | 1,798 (23%)  |
|                           | Rivaroxaban | Dabigatran   | Apixaban    | Dabigatran   | Rivaroxaban | Apixaban     |
| Standard                  | 4,443 (72%) | 5,350 (85%)  | 2,059 (81%) | 2,121 (85%)  | 5,316 (68%) | 6,025 (77%)  |
| Reduced                   | 1,735 (28%) | 944 (15%)    | 469 (19%)   | 387 (15%)    | 2,499 (32%) | 1,799 (23%)  |
| <b>Optum</b>              |             |              |             |              |             |              |
|                           | Warfarin    | Dabigatran   | Warfarin    | Rivaroxaban  | Warfarin    | Apixaban     |
| Standard                  | N/A         | 4,815 (86%)  | N/A         | 6,114 (68%)  | N/A         | 3,929 (74%)  |
| Reduced                   | N/A         | 806 (14%)    | N/A         | 2,880 (32%)  | N/A         | 1,375 (26%)  |
|                           | Rivaroxaban | Dabigatran   | Apixaban    | Dabigatran   | Rivaroxaban | Apixaban     |
| Standard                  | 2,585 (69%) | 3,187 (84%)  | 1,427 (79%) | 1,485 (82%)  | 3,427 (65%) | 3,928 (74%)  |
| Reduced                   | 1,155 (31%) | 622 (16%)    | 379 (21%)   | 336 (18%)    | 1,881 (35%) | 1,375 (26%)  |
| <b>Men - MarketScan</b>   |             |              |             |              |             |              |
|                           | Warfarin    | Dabigatran   | Warfarin    | Rivaroxaban  | Warfarin    | Apixaban     |
| Standard                  | N/A         | 19,059 (94%) | N/A         | 19,837 (81%) | N/A         | 10,255 (89%) |
| Reduced                   | N/A         | 1,259 (6%)   | N/A         | 4,512 (19%)  | N/A         | 1,245 (11%)  |
|                           | Rivaroxaban | Dabigatran   | Apixaban    | Dabigatran   | Rivaroxaban | Apixaban     |
| Standard                  | 9,892 (83%) | 10,919 (93%) | 4,201 (91%) | 4,240 (92%)  | 9,192 (80%) | 10,289 (89%) |

|              |             |             |             |              |             |             |
|--------------|-------------|-------------|-------------|--------------|-------------|-------------|
| Reduced      | 1,987 (17%) | 844 (7%)    | 396 (9%)    | 377 (8%)     | 2,351 (20%) | 1,245 (11%) |
| <b>Optum</b> |             |             |             |              |             |             |
|              | Warfarin    | Dabigatran  | Warfarin    | Rivaroxaban  | Warfarin    | Apixaban    |
| Standard     | N/A         | 8,896 (93%) | N/A         | 10,823 (81%) | N/A         | 5,622 (87%) |
| Reduced      | N/A         | 662 (7%)    | N/A         | 2,622 (19%)  | N/A         | 858 (13%)   |
|              | Rivaroxaban | Dabigatran  | Apixaban    | Dabigatran   | Rivaroxaban | Apixaban    |
| Standard     | 5,295 (82%) | 5,863 (92%) | 2,647 (90%) | 2,665 (91%)  | 5,009 (77%) | 5,622 (87%) |
| Reduced      | 1,143 (18%) | 506 (8%)    | 304 (10%)   | 271 (9%)     | 1,466 (23%) | 858 (13%)   |

Table s5. Incidence of dementia among patients with atrial fibrillation initially treated with dabigatran, rivaroxaban, or apixaban versus warfarin: MarketScan, 2010-2015.

|                                           | Dabigatran        | vs | Warfarin |
|-------------------------------------------|-------------------|----|----------|
| n                                         | 31,304            |    | 31,304   |
| Dementia, n                               | 419               |    | 450      |
| Follow-up in years,<br>mean               | 1.8               |    | 1.6      |
| Incident rate (per 1000<br>person-years)  | 7.4               |    | 9.0      |
| Hazard ratio (95%<br>confidence interval) |                   |    |          |
| Model 1*                                  | 0.80 (0.70, 0.91) |    | 1        |
| Model 2 †                                 | 0.78 (0.68, 0.89) |    | 1        |

  

|                                           | Rivaroxaban | vs | Warfarin |
|-------------------------------------------|-------------|----|----------|
| n                                         | 39,202      |    | 39,202   |
| Dementia, n                               | 383         |    | 552      |
| Follow-up in years,<br>mean               | 1.1         |    | 1.3      |
| Incident rate (per 1000<br>person-years)  | 8.7         |    | 10.5     |
| Hazard ratio (95%<br>confidence interval) |             |    |          |

|          |                   |   |
|----------|-------------------|---|
| Model 1* | 0.89 (0.78, 1.02) | 1 |
| Model 2† | 0.88 (0.77, 1.01) | 1 |

---

|                                           | Apixaban          | vs | Warfarin |
|-------------------------------------------|-------------------|----|----------|
| n                                         | 19,305            |    | 19,305   |
| Dementia, n                               | 160               |    | 264      |
| Follow-up in years,<br>mean               | 0.7               |    | 1.1      |
| Incident rate (per 1000<br>person-years)  | 11.3              |    | 12.4     |
| Hazard ratio (95%<br>confidence interval) |                   |    |          |
| Model 1*                                  | 0.90 (0.73, 1.09) |    | 1        |
| Model 2†                                  | 0.87 (0.71, 1.06) |    | 1        |

---

\*Model 1 adjusted for age, sex, and prevalent cognitive impairment;

†Model 2 additionally adjusted for comorbidities, medications, CHA<sub>2</sub>DS<sub>2</sub>-VASc and HAS-BLED score.

Table s6. Incidence of dementia among patients with atrial fibrillation initially treated with dabigatran, rivaroxaban, or apixaban versus warfarin: Optum, 2010-2015

|                                           | Dabigatran        | vs | Warfarin |
|-------------------------------------------|-------------------|----|----------|
| n                                         | 15,179            |    | 15,179   |
| Dementia, n                               | 305               |    | 289      |
| Follow-up in years,<br>mean               | 2.2               |    | 2.0      |
| Incident rate (per 1000<br>person-years)  | 9.2               |    | 9.7      |
| Hazard ratio (95%<br>confidence interval) |                   |    |          |
| Model 1*                                  | 0.92 (0.79, 1.09) |    | 1        |
| Model 2†                                  | 0.93 (0.79, 1.09) |    | 1        |

  

|                                           | Rivaroxaban | vs | Warfarin |
|-------------------------------------------|-------------|----|----------|
| n                                         | 22,439      |    | 22,439   |
| Dementia, n                               | 265         |    | 392      |
| Follow-up in years,<br>mean               | 1.4         |    | 1.7      |
| Incident rate (per 1000<br>person-years)  | 8.6         |    | 10.5     |
| Hazard ratio (95%<br>confidence interval) |             |    |          |

|          |                   |   |
|----------|-------------------|---|
| Model 1* | 0.81 (0.69, 0.94) | 1 |
| Model 2† | 0.80 (0.69, 0.94) | 1 |

---

|                                           | Apixaban          | vs | Warfarin |
|-------------------------------------------|-------------------|----|----------|
| n                                         | 11,784            |    | 11,784   |
| Dementia, n                               | 117               |    | 210      |
| Follow-up in years,<br>mean               | 0.9               |    | 1.3      |
| Incident rate (per 1000<br>person-years)  | 10.5              |    | 13.6     |
| Hazard ratio (95%<br>confidence interval) |                   |    |          |
| Model 1*                                  | 0.70 (0.56, 0.89) |    | 1        |
| Model 2†                                  | 0.71 (0.56, 0.90) |    | 1        |

---

\*Model 1 adjusted for age, sex, race, education level, household income level, and prevalent cognitive impairment;

†Model 2 additionally adjusted for comorbidities, medications, CHA<sub>2</sub>DS<sub>2</sub>-VASc and HAS-BLED score.

Table s7. Meta-analyzed hazard ratios and 95% confidence intervals of incident dementia in oral anticoagulant comparison cohorts with further adjustment of incident ischemic stroke: MarketScan and Optum, 2010-2015.

| Hazard ratios<br>(95%<br>confidence<br>intervals) | Warfarin | Dabigatran           | Warfarin | Rivaroxaban          | Warfarin | Apixaban             |
|---------------------------------------------------|----------|----------------------|----------|----------------------|----------|----------------------|
| Model 1*                                          | 1        | 0.85 (0.74,<br>0.97) | 1        | 0.85 (0.77,<br>0.94) | 1        | 0.80 (0.63,<br>1.03) |
| Model 2 †                                         | 1        | 0.85 (0.71,<br>1.01) | 1        | 0.85 (0.76,<br>0.94) | 1        | 0.80 (0.65,<br>0.97) |
| Model 3 ‡                                         | 1        | 0.85 (0.71,<br>1.02) | 1        | 0.87 (0.78,<br>0.96) | 1        | 0.80 (0.65,<br>0.99) |

\*Model 1 adjusted for age, sex, and prevalent cognitive impairment in study from MarketScan and age, sex, race, education level, household income level, and prevalent cognitive impairment in study from Optum;

†Model 2 additionally adjusted for comorbidities, medications, CHA<sub>2</sub>DS<sub>2</sub>-VASc and HAS-BLED score;

‡Model 3 additionally adjusted for incident ischemic stroke.

Table s8. Comparisons of incidence of dementia (defined based on inpatient diagnosis) among patients with atrial fibrillation initially treated with dabigatran, rivaroxaban, or apixaban: MarketScan, 2010-2015.

|                                        | Dabigatran        | vs | Rivaroxaban |
|----------------------------------------|-------------------|----|-------------|
| n                                      | 18,057            |    | 18,057      |
| Dementia, n                            | 211               |    | 164         |
| Follow-up in years, mean               | 1.6               |    | 1.1         |
| Incident rate (per 1000 person-years)  | 7.5               |    | 8.1         |
| Hazard ratio (95% confidence interval) |                   |    |             |
| Model 1*                               | 0.94 (0.76, 1.15) |    | 1           |
| Model 2†                               | 0.90 (0.73, 1.10) |    | 1           |

  

|                                        | Dabigatran        | vs | Apixaban |
|----------------------------------------|-------------------|----|----------|
| n                                      | 7,125             |    | 7,125    |
| Dementia, n                            | 60                |    | 48       |
| Follow-up in years, mean               | 1.2               |    | 0.7      |
| Incident rate (per 1000 person-years)  | 6.7               |    | 9.0      |
| Hazard ratio (95% confidence interval) |                   |    |          |
| Model 1*                               | 0.79 (0.54, 1.16) |    | 1        |



Model 2† 0.76 (0.51, 1.13) 1

---

|                                        | Apixaban          | vs | Rivaroxaban |
|----------------------------------------|-------------------|----|-------------|
| n                                      | 19,358            |    | 19,358      |
| Dementia, n                            | 160               |    | 206         |
| Follow-up in years, mean               | 0.7               |    | 1.0         |
| Incident rate (per 1000 person-years)  | 11.3              |    | 10.7        |
| Hazard ratio (95% confidence interval) |                   |    |             |
| Model 1*                               | 1.03 (0.83, 1.27) |    | 1           |
| Model 2†                               | 1.03 (0.84, 1.28) |    | 1           |

---

\*Model 1 adjusted for age, sex, and prevalent cognitive impairment;

†Model 2 additionally adjusted for comorbidities, medications, CHA<sub>2</sub>DS<sub>2</sub>-VASc and HAS-BLED score.

Table s9. Comparisons of incidence of dementia (defined based on inpatient diagnosis) among patients with atrial fibrillation initially treated with dabigatran, rivaroxaban, or apixaban: Optum, 2010-2015

|                                        | Dabigatran        | vs | Rivaroxaban |
|----------------------------------------|-------------------|----|-------------|
| n                                      | 10,178            |    | 10,178      |
| Dementia, n                            | 188               |    | 126         |
| Follow-up in years, mean               | 1.9               |    | 1.4         |
| Incident rate (per 1000 person-years)  | 9.5               |    | 9.1         |
| Hazard ratio (95% confidence interval) |                   |    |             |
| Model 1*                               | 1.14 (0.90, 1.43) |    | 1           |
| Model 2†                               | 1.17 (0.93, 1.48) |    | 1           |

  

|                                        | Dabigatran        | vs | Apixaban |
|----------------------------------------|-------------------|----|----------|
| N                                      | 4,757             |    | 4,757    |
| Dementia, n                            | 59                |    | 39       |
| Follow-up in years, mean               | 1.5               |    | 1.0      |
| Incident rate (per 1000 person-years)  | 8.3               |    | 8.6      |
| Hazard ratio (95% confidence interval) |                   |    |          |
| Model 1*                               | 1.16 (0.76, 1.75) |    | 1        |
| Model 2†                               | 1.13 (0.75, 1.71) |    | 1        |

|                                        | Apixaban          | vs | Rivaroxaban |
|----------------------------------------|-------------------|----|-------------|
| n                                      | 11,785            |    | 11,785      |
| Dementia, n                            | 119               |    | 154         |
| Follow-up in years, mean               | 0.9               |    | 1.2         |
| Incident rate (per 1000 person-years)  | 10.6              |    | 10.5        |
| Hazard ratio (95% confidence interval) |                   |    |             |
| Model 1*                               | 0.94 (0.74, 1.20) |    | 1           |
| Model 2†                               | 0.99 (0.77, 1.26) |    | 1           |

\*Model 1 adjusted for age, sex, race, education level, household income level, and prevalent cognitive impairment;

†Model 2 additionally adjusted for comorbidities, medications, CHA<sub>2</sub>DS<sub>2</sub>-VASc and HAS-BLED score.

Table s10. Incidence of dementia among patients with atrial fibrillation initially treated with dabigatran, rivaroxaban, or apixaban versus warfarin: MarketScan, 2010-2015.

Dementia defined based on inpatient and outpatient diagnoses.

|                                        | Dabigatran        | vs | Warfarin |
|----------------------------------------|-------------------|----|----------|
| n                                      | 30,704            |    | 30,704   |
| Dementia, n                            | 1,043             |    | 1,155    |
| follow-up/year, mean                   | 1.8               |    | 1.6      |
| Incident rate (per 1000 person-years)  | 19.0              |    | 24.1     |
| Hazard ratio (95% confidence interval) |                   |    |          |
| Model 1*                               | 0.77 (0.71, 0.84) |    | 1        |
| Model 2†                               | 0.75 (0.69, 0.82) |    | 1        |

  

|                                        | Rivaroxaban       | vs | Warfarin |
|----------------------------------------|-------------------|----|----------|
| n                                      | 38,485            |    | 38,485   |
| Dementia, n                            | 1,005             |    | 1,394    |
| Follow-up/year, mean                   | 1.1               |    | 1.3      |
| Incident rate (per 1000 person-years)  | 23.5              |    | 27.4     |
| Hazard ratio (95% confidence interval) |                   |    |          |
| Model 1*                               | 0.91 (0.83, 0.98) |    | 1        |

|                                        |                   |             |
|----------------------------------------|-------------------|-------------|
| Model 2†                               | 0.88 (0.81, 0.95) | 1           |
| <hr/>                                  |                   |             |
|                                        | Apixaban          | vs Warfarin |
| n                                      | 18,876            | 18,876      |
| Dementia, n                            | 415               | 686         |
| Follow-up/year, mean                   | 0.7               | 1.1         |
| Incident rate (per 1000 person-years)  | 30.2              | 33.4        |
| Hazard ratio (95% confidence interval) |                   |             |
| Model 1*                               | 0.89 (0.78, 1.00) | 1           |
| Model 2†                               | 0.86 (0.76, 0.98) | 1           |

\*Model 1 adjusted for age, sex, and prevalent cognitive impairment;

†Model 2 additionally adjusted for comorbidities, medications, CHA<sub>2</sub>DS<sub>2</sub>-VASc and HAS-BLED score.

Table s11. Incidence of dementia among patients with atrial fibrillation initially treated with dabigatran, rivaroxaban, or apixaban versus warfarin: Optum, 2010-2015. Dementia defined based on inpatient and outpatient diagnoses.

|                                        | Dabigatran        | vs | Warfarin |
|----------------------------------------|-------------------|----|----------|
| n                                      | 14,735            |    | 14,735   |
| Dementia, n                            | 666               |    | 722      |
| Follow-up in years, mean               | 2.2               |    | 1.9      |
| Incident rate (per 1000 person-years)  | 20.9              |    | 25.2     |
| Hazard ratio (95% confidence interval) |                   |    |          |
| Model 1*                               | 0.82 (0.74, 0.92) |    | 1        |
| Model 2†                               | 0.84 (0.75, 0.93) |    | 1        |

  

|                                        | Rivaroxaban       | vs | Warfarin |
|----------------------------------------|-------------------|----|----------|
| n                                      | 21,693            |    | 21,693   |
| Dementia, n                            | 582               |    | 958      |
| Follow-up in years, mean               | 1.4               |    | 1.6      |
| Incident rate (per 1000 person-years)  | 19.8              |    | 27.0     |
| Hazard ratio (95% confidence interval) |                   |    |          |
| Model 1*                               | 0.70 (0.63, 0.78) |    | 1        |

|          |                   |   |
|----------|-------------------|---|
| Model 2† | 0.70 (0.63, 0.78) | 1 |
|----------|-------------------|---|

|                                        | Apixaban          | vs | Warfarin |
|----------------------------------------|-------------------|----|----------|
| n                                      | 11,342            |    | 11,342   |
| Dementia, n                            | 245               |    | 457      |
| Follow-up in years, mean               | 0.9               |    | 1.3      |
| Incident rate (per 1000 person-years)  | 22.9              |    | 31.3     |
| Hazard ratio (95% confidence interval) |                   |    |          |
| Model 1*                               | 0.62 (0.53, 0.73) |    | 1        |
| Model 2†                               | 0.61 (0.52, 0.72) |    | 1        |

\*Model 1 adjusted for age, sex, race, education level, household income level, and prevalent cognitive impairment;

†Model 2 additionally adjusted for comorbidities, medications, CHA<sub>2</sub>DS<sub>2</sub>-VASc and HAS-BLED score.

Table s12. Comparisons of incidence of dementia (defined based on inpatient and outpatient diagnosis) among patients with atrial fibrillation initially treated with dabigatran, rivaroxaban, or apixaban: MarketScan, 2010-2015.

|                                        | Dabigatran        | Vs | Rivaroxaban |
|----------------------------------------|-------------------|----|-------------|
| n                                      | 17,722            |    | 17,722      |
| Dementia, n                            | 497               |    | 437         |
| Follow-up in years, mean               | 1.6               |    | 1.1         |
| Incident rate (per 1000 person-years)  | 18.0              |    | 21.9        |
| Hazard ratio (95% confidence interval) |                   |    |             |
| Model 1*                               | 0.85 (0.75, 0.97) |    | 1           |
| Model 2†                               | 0.84 (0.73, 0.95) |    | 1           |

  

|                                        | Dabigatran        | vs | Apixaban |
|----------------------------------------|-------------------|----|----------|
| n                                      | 6,991             |    | 6,991    |
| Dementia, n                            | 168               |    | 117      |
| Follow-up in years, mean               | 1.3               |    | 0.7      |
| Incident rate (per 1000 person-years)  | 19.4              |    | 22.6     |
| Hazard ratio (95% confidence interval) |                   |    |          |
| Model 1*                               | 0.97 (0.76, 1.23) |    | 1        |





Table s13. Comparisons of incidence of dementia (defined based on inpatient and outpatient diagnosis) among patients with atrial fibrillation initially treated with dabigatran, rivaroxaban, or apixaban: Optum, 2010-2015.

|                                           | Dabigatran        | vs | Rivaroxaban |
|-------------------------------------------|-------------------|----|-------------|
| n                                         | 9,874             |    | 9,874       |
| Dementia, n                               | 403               |    | 253         |
| Follow-up in years,<br>mean               | 1.9               |    | 1.4         |
| Incident rate (per 1000<br>person-years)  | 21.2              |    | 19.0        |
| Hazard ratio (95%<br>confidence interval) |                   |    |             |
| Model 1*                                  | 1.20 (1.03, 1.41) |    | 1           |
| Model 2†                                  | 1.20 (1.02, 1.41) |    | 1           |

  

|                                          | Dabigatran | vs | Apixaban |
|------------------------------------------|------------|----|----------|
| n                                        | 4,591      |    | 4,591    |
| Dementia, n                              | 153        |    | 69       |
| Follow-up in years,<br>mean              | 1.5        |    | 0.9      |
| Incident rate (per 1000<br>person-years) | 22.6       |    | 15.9     |
| Hazard ratio (95%                        |            |    |          |

confidence interval)

Model 1\* 1.55 (1.16, 2.08) 1

Model 2† 1.53 (1.14, 2.05) 1

---

|                                           | Apixaban          | vs | Rivaroxaban |
|-------------------------------------------|-------------------|----|-------------|
| n                                         | 11,341            |    | 11,341      |
| Dementia, n                               | 245               |    | 323         |
| Follow-up in years,<br>mean               | 0.9               |    | 1.2         |
| Incident rate (per 1000<br>person-years)  | 22.9              |    | 23.0        |
| Hazard ratio (95%<br>confidence interval) |                   |    |             |
| Model 1*                                  | 0.91 (0.77, 1.08) |    | 1           |
| Model 2†                                  | 0.93 (0.78, 1.10) |    | 1           |

---

\*Model 1 adjusted for age, sex, race, education level, household income level, and prevalent cognitive impairment;

†Model 2 additionally adjusted for comorbidities, medications, CHA<sub>2</sub>DS<sub>2</sub>-VASc and HAS-BLED score.

Table s14. Database-specific and meta-analyzed hazard ratios and 95% confidence intervals of incident dementia in oral anticoagulant comparison cohorts using refined baseline cognitive impairment adjustment: MarketScan and Optum, 2010-2015

|            | Warfarin    | Dabigatran        | Warfarin | Rivaroxaban       | Warfarin    | Apixaban          |
|------------|-------------|-------------------|----------|-------------------|-------------|-------------------|
| MarketScan | 1 (ref.)    | 0.78 (0.68, 0.89) | 1 (ref.) | 0.88 (0.77, 1.01) | 1 (ref.)    | 0.88 (0.72, 1.07) |
| Optum      | 1 (ref.)    | 0.92 (0.78, 1.09) | 1 (ref.) | 0.80 (0.68, 0.94) | 1 (ref.)    | 0.71 (0.56, 0.89) |
| Pooled     | 1 (ref.)    | 0.83 (0.75, 0.92) | 1 (ref.) | 0.85 (0.76, 0.94) | 1 (ref.)    | 0.80 (0.69, 0.93) |
|            | Rivaroxaban | Dabigatran        | Apixaban | Dabigatran        | Rivaroxaban | Apixaban          |
| MarketScan | 1 (ref.)    | 0.89 (0.73, 1.10) | 1 (ref.) | 0.74 (0.50, 1.10) | 1 (ref.)    | 1.04 (0.84, 1.28) |
| Optum      | 1 (ref.)    | 1.17 (0.92, 1.47) | 1 (ref.) | 1.13 (0.74, 1.71) | 1 (ref.)    | 0.92 (0.72, 1.18) |
| Pooled     | 1 (ref.)    | 1.00 (0.86, 1.17) | 1 (ref.) | 0.90 (0.68, 1.20) | 1 (ref.)    | 0.99 (0.84, 1.16) |

Results from Cox models adjusted for age, sex, prevalent cognitive impairment in inpatient claims, prevalent cognitive impairment in outpatient claims, comorbidities, medications, CHA<sub>2</sub>DS<sub>2</sub>-VASc and HAS-BLED scores, and, in the Optum dataset, race, education level, and household income.

Table s15. Database-specific and meta-analyzed hazard ratios and 95% confidence intervals of incident dementia in oral anticoagulant comparison cohorts censoring patients at the time of oral anticoagulant discontinuation or switching: MarketScan and Optum, 2010-2015

|            | Warfarin    | Dabigatran        | Warfarin | Rivaroxaban       | Warfarin    | Apixaban          |
|------------|-------------|-------------------|----------|-------------------|-------------|-------------------|
| MarketScan | 1 (ref.)    | 0.79 (0.64, 0.96) | 1 (ref.) | 0.89 (0.75, 1.06) | 1 (ref.)    | 0.85 (0.67, 1.08) |
| Optum      | 1 (ref.)    | 0.83 (0.64, 1.06) | 1 (ref.) | 0.85 (0.69, 1.04) | 1 (ref.)    | 0.66 (0.50, 0.87) |
| Pooled     | 1 (ref.)    | 0.81 (0.69, 0.94) | 1 (ref.) | 0.87 (0.76, 1.00) | 1 (ref.)    | 0.76 (0.64, 0.91) |
|            | Rivaroxaban | Dabigatran        | Apixaban | Dabigatran        | Rivaroxaban | Apixaban          |
| MarketScan | 1 (ref.)    | 0.86 (0.65, 1.13) | 1 (ref.) | 0.65 (0.40, 1.07) | 1 (ref.)    | 1.02 (0.80, 1.30) |
| Optum      | 1 (ref.)    | 1.00 (0.73, 1.38) | 1 (ref.) | 1.00 (0.61, 1.65) | 1 (ref.)    | 0.87 (0.65, 1.16) |
| Pooled     | 1 (ref.)    | 0.92 (0.74, 1.13) | 1 (ref.) | 0.80 (0.57, 1.14) | 1 (ref.)    | 0.96 (0.79, 1.15) |

Results from Cox models adjusted for age, sex, prevalent cognitive impairment in inpatient claims, prevalent cognitive impairment in outpatient claims, comorbidities, medications, CHA<sub>2</sub>DS<sub>2</sub>-VASc and HAS-BLED scores, and, in the Optum dataset, race, education level, and household income.

Table s16. Adjusted hazard ratios (HRs) and 95% confidence intervals (CIs)\* of dementia in matched cohort stratified by age, gender, and CHA<sub>2</sub>DS<sub>2</sub>-VASc score: MarketScan, 2010-2015.

| Comparison of DOACs with Warfarin         |        | Comparison among Dabigatran, Rivaroxaban, and Apixaban |                                           |          |                          |
|-------------------------------------------|--------|--------------------------------------------------------|-------------------------------------------|----------|--------------------------|
|                                           |        | Dabigatran vs Rivaroxaban                              |                                           | Apixaban |                          |
|                                           | n      | Hazard Ratio<br>(95% CI)                               |                                           | n        | Hazard Ratio<br>(95% CI) |
| Dabigatran vs Warfarin                    |        |                                                        | Dabigatran vs Rivaroxaban                 |          |                          |
| Age≤75                                    | 44,714 | 0.84 (0.61, 1.15)                                      | Age≤75                                    | 26,744   | 0.90 (0.57, 1.44)        |
| Age>75                                    | 17,894 | 0.77 (0.66, 0.89)                                      | Age>75                                    | 9,370    | 0.90 (0.71, 1.13)        |
|                                           |        | p-value 0.56                                           |                                           |          | p-value 0.87             |
| Men                                       | 40,729 | 0.80 (0.66, 0.97)                                      | Men                                       | 23,642   | 0.90 (0.66, 1.24)        |
| Women                                     | 21,879 | 0.76 (0.63, 0.91)                                      | Women                                     | 12,472   | 0.87 (0.66, 1.14)        |
|                                           |        | p-value 0.59                                           |                                           |          | p-value 0.65             |
| CHA <sub>2</sub> DS <sub>2</sub> -VASc <2 | 15,309 | 0.36 (0.10, 1.34)                                      | CHA <sub>2</sub> DS <sub>2</sub> -VASc <2 | 9,638    | 0.39 (0.04, 3.57)        |
| CHA <sub>2</sub> DS <sub>2</sub> -VASc ≥2 | 47,299 | 0.78 (0.69, 0.90)                                      | CHA <sub>2</sub> DS <sub>2</sub> -VASc ≥2 | 26,476   | 0.89 (0.73, 1.11)        |
|                                           |        | p-value 0.37                                           |                                           |          | p-value 0.80             |
| Rivaroxaban vs Warfarin                   |        |                                                        | Dabigatran vs Apixaban                    |          |                          |
| Age≤75                                    | 54,897 | 0.73 (0.54, 0.98)                                      | Age≤75                                    | 10,441   | 0.68 (0.26, 1.75)        |
| Age>75                                    | 23,507 | 0.94 (0.81, 1.08)                                      | Age>75                                    | 3,809    | 0.82 (0.53, 1.26)        |
|                                           |        | p-value 0.21                                           |                                           |          | p-value 0.55             |
| Men                                       | 48,465 | 0.77 (0.62, 0.94)                                      | Men                                       | 9,214    | 0.62 (0.34, 1.14)        |
| Women                                     | 29,939 | 0.99 (0.83, 1.18)                                      | Women                                     | 5,036    | 0.90 (0.52, 1.54)        |

|                                           |        |                   |                                           |        |                   |
|-------------------------------------------|--------|-------------------|-------------------------------------------|--------|-------------------|
|                                           |        | p-value 0.10      |                                           |        | p-value 0.33      |
| CHA <sub>2</sub> DS <sub>2</sub> -VASc <2 | 17,587 | 1.00 (0.37, 2.74) | CHA <sub>2</sub> DS <sub>2</sub> -VASc <2 |        |                   |
| CHA <sub>2</sub> DS <sub>2</sub> -VASc ≥2 | 60,817 | 0.89 (0.78, 1.01) | CHA <sub>2</sub> DS <sub>2</sub> -VASc ≥2 |        |                   |
|                                           |        | p-value 0.82      |                                           |        |                   |
| <hr/>                                     |        |                   | <hr/>                                     |        |                   |
| Warfarin vs Apixaban                      |        |                   | Apixaban vs Rivaroxaban                   |        |                   |
| Age≤75                                    | 25,070 | 0.81 (0.50, 1.30) | Age≤75                                    | 25,552 | 1.08 (0.65, 1.81) |
| Age>75                                    | 13,540 | 0.90 (0.72, 1.12) | Age>75                                    | 13,164 | 1.03 (0.82, 1.30) |
|                                           |        | p-value 0.60      |                                           |        | p-value 0.71      |
| Men                                       | 23,075 | 0.90 (0.66, 1.21) | Men                                       | 23,077 | 1.18 (0.86, 1.64) |
| Women                                     | 15,535 | 0.85 (0.65, 1.11) | Women                                     | 15,639 | 0.91 (0.69, 1.20) |
|                                           |        | p-value 0.69      |                                           |        | p-value 0.19      |
| CHA <sub>2</sub> DS <sub>2</sub> -VASc <2 | 6,960  | 0.43 (0.04, 4.60) | CHA <sub>2</sub> DS <sub>2</sub> -VASc <2 | 7,463  | 0.36 (0.04, 3.25) |
| CHA <sub>2</sub> DS <sub>2</sub> -VASc ≥2 | 31,650 | 0.88 (0.72, 1.08) | CHA <sub>2</sub> DS <sub>2</sub> -VASc ≥2 | 31,253 | 1.05 (0.85, 1.30) |
|                                           |        | p-value 0.28      |                                           |        | p-value 0.24      |

\*Models adjusted for age, sex, prevalent cognitive impairment, comorbidities, medications, CHA<sub>2</sub>DS<sub>2</sub>-VASc and HAS-BLED score.

†DOAC: direct oral anticoagulant.

Table s17. Adjusted hazard ratios (HRs) and 95% confidence intervals (CIs)\* of dementia in matched cohort stratified by age and gender: Optum, 2010-2015.

| Comparison of DOACs with Warfarin |        | Comparison among Dabigatran, Rivaroxaban, and Apixaban |                           |               |                   |
|-----------------------------------|--------|--------------------------------------------------------|---------------------------|---------------|-------------------|
|                                   |        | Apixaban                                               |                           | Apixaban      |                   |
|                                   |        | Hazard Ratio                                           |                           | Hazard Ratio  |                   |
|                                   |        | n                                                      | (95% CI)                  | n             | (95% CI)          |
| Dabigatran vs Warfarin            |        |                                                        | Dabigatran vs Rivaroxaban |               |                   |
| Age≤75                            | 20,530 | 0.61 (0.41, 0.89)                                      | Age≤75                    | 13,744        | 0.54 (0.32, 0.91) |
| Age>75                            | 9,828  | 1.04 (0.87, 1.25)                                      | Age>75                    | 6,612         | 1.41 (1.09, 1.84) |
|                                   |        | p-value 0.01                                           |                           | p-value 0.002 |                   |
| Men                               | 19,164 | 0.93 (0.73, 1.18)                                      | Men                       | 12,807        | 1.06 (0.77, 1.47) |
| Women                             | 11,194 | 0.93 (0.75, 1.16)                                      | Women                     | 7,549         | 1.30 (0.93, 1.81) |
|                                   |        | p-value 0.93                                           |                           | p-value 0.44  |                   |
| Rivaroxaban vs Warfarin           |        |                                                        | Dabigatran vs Apixaban    |               |                   |
| Age≤75                            | 28,909 | 0.71 (0.50, 0.99)                                      | Age≤75                    | 6,212         | 0.65 (0.22, 1.88) |
| Age>75                            | 15,969 | 0.86 (0.72, 1.03)                                      | Age>75                    | 3,302         | 1.27 (0.80, 2.03) |
|                                   |        | p-value 0.24                                           |                           | p-value 0.26  |                   |
| Men                               | 26,866 | 0.96 (0.76, 1.21)                                      | Men                       | 5,887         | 1.92 (0.95, 3.87) |
| Women                             | 18,012 | 0.70 (0.56, 0.87)                                      | Women                     | 3,627         | 0.80 (0.47, 1.38) |
|                                   |        | p-value 0.04                                           |                           | p-value 0.04  |                   |
| Apixaban vs Warfarin              |        |                                                        | Apixaban vs Rivaroxaban   |               |                   |



|        |        |                   |        |        |                   |
|--------|--------|-------------------|--------|--------|-------------------|
| Age≤75 | 13,447 | 0.90 (0.52, 1.54) | Age≤75 | 13,459 | 1.20 (0.67, 2.17) |
| Age>75 | 10,121 | 0.69 (0.53, 0.89) | Age>75 | 10,111 | 0.94 (0.72, 1.23) |
|        |        | p-value 0.45      |        |        | p-value 0.52      |
| Men    | 12,921 | 0.55 (0.39, 0.80) | Men    | 12,976 | 0.79 (0.54, 1.16) |
| Women  | 10,647 | 0.86 (0.63, 1.17) | Women  | 10,594 | 1.17 (0.85, 1.61) |
|        |        | p-value 0.09      |        |        | p-value 0.12      |

---

\*Models adjusted for age, sex, race, education level, household income level, prevalent cognitive impairment, comorbidities, medications, CHA<sub>2</sub>DS<sub>2</sub>-VASc and HAS-BLED score.

†DOAC: direct oral anticoagulant.

Table s18. Odds ratios (ORs) and 95% confidence intervals (CIs) of having DOAC prescription (versus warfarin) among atrial fibrillation patients with dementia and cognitive impairment before OAC initiation compared with cognitively normal patients: MarketScan, 2007-2015, and Optum, 2009-2015.

|            |             | Individuals with<br>dementia and other<br>cognitive impairment | Cognitively normal enrollees |
|------------|-------------|----------------------------------------------------------------|------------------------------|
| MarketScan | n           | 13,224                                                         | 298,333                      |
|            | OR* (95%CI) | 0.99 (0.90, 1.10)                                              | 1                            |
| Optum      | n           | 11,146                                                         | 153,874                      |
|            | OR† (95%CI) | 0.91 (0.81, 1.03)                                              | 1                            |
| Combined   |             | 0.96 (0.88, 1.04)                                              | 1                            |

\*Odds ratio adjusted for age, sex, comorbidities, medications, CHA<sub>2</sub>DS<sub>2</sub>-VASc and HAS-BLED score in MarketScan;

†Odds ratio adjusted for age, sex, race, education level, household income level, comorbidities, medications, CHA<sub>2</sub>DS<sub>2</sub>-VASc and HAS-BLED score in Optum.

‡DOAC: direct oral anticoagulant; OAC: oral anticoagulant.
